# Supplementary material for: Sensitive Detection of KRAS Mutations by Clustered Regularly Interspaced Short Palindromic Repeats
Source: PubMed Central journal article supplement (PMC7830957; doi:10.3390/diagnostics11010125), 2021-01-15
Supplement: diagnostics-11-00125-s001.pdf [file diagnostics-11-00125-s001.pdf]

## Supplementary file

**Supplemental table 1.** Primer of KRAS of PCR for CRSIPR

| Primer name | Sequence (5'->3')    |
|-------------|----------------------|
| Kras-F      | AACTTGTGGTAGTTTGAGCT |
| Kras-R      | TCTATTGTTGGATCATATTC |

**Supplemental table 2.** Primers of KRAS of PCR for DNA sequencing analysis

| Primer name | Sequence (5'->3')           |
|-------------|-----------------------------|
| EX2-F       | 5'-AACTTGTGGTAGTTGGAGCTG-3' |
| EX2-R       | 5'-GTTGGATCATATTCGTCCACA-3' |
